# Supplementary material for: Metal–organic chemical vapor deposition of ε-Ga2O3 thin film using N2O as a precursor
Source: Royal Society of Chemistry journal article supplement (doi:10.1039/d3ce00078h), 2023-01-01
Supplement: d3ce00078h1.pdf [file d3ce00078h1.pdf]

# **Metal–organic Chemical Vapor Deposition of $\epsilon$ -Ga<sub>2</sub>O<sub>3</sub> Thin Film Using N<sub>2</sub>O Precursor**

*Shujian Chen<sup>1</sup>, Zimin Chen<sup>1\*</sup>, Weiqu Chen<sup>1</sup>, Zeyuan Fei<sup>1</sup>, Tiecheng Luo<sup>1</sup>, Jun Liang<sup>2</sup>,  
Xinzhong Wang<sup>2</sup>, Gang Wang<sup>1</sup>, and Yanli Pei<sup>1\*</sup>*

<sup>1</sup>State Key Lab of Optoelectronics Materials & Technology, School of Electronics  
and Information Technology, Sun Yat-sen university, Guangzhou 510006, China

<sup>2</sup>Shenzhen Institute of Information Technology, Shenzhen 518172, China

*\*E-mail: [chenzim8@mail.sysu.edu.cn](mailto:chenzim8@mail.sysu.edu.cn); [peiyali@mail.sysu.edu.cn](mailto:peiyali@mail.sysu.edu.cn)*

## Section S1. XRD rocking curves measurement

Figure S1 shows XRD rocking curves of Ga<sub>2</sub>O<sub>3</sub> (004) plane grown with different conditions (temperatures and VI/III ratios). Experimental rocking curves are fitted with Gaussian function. The extracted FWHM values are listed in Table S1.

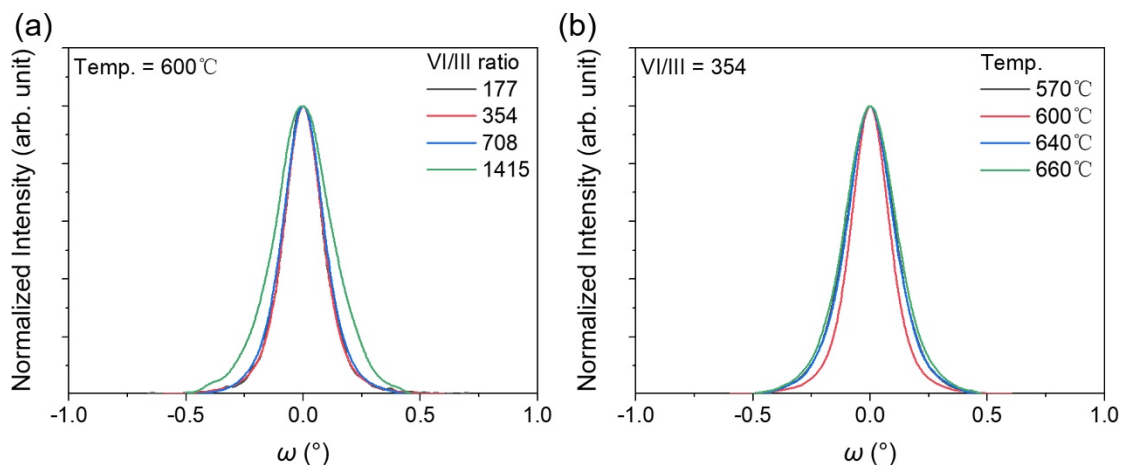

Figure S1. XRD rocking curves of Ga<sub>2</sub>O<sub>3</sub> (004) plane grown with (a) various temperatures and (b) various VI/III ratios.

Table S1. The fitted FWHM of rocking curve of Ga<sub>2</sub>O<sub>3</sub>

| <i>Sample</i> | <i>Growth T (°C)</i> | <i>VI/III ratio</i> | <i>FWHM(°)</i> |
|---------------|----------------------|---------------------|----------------|
| A             | 600                  | 177                 | 0.200          |
| B             | 600                  | 354                 | 0.197          |
| C             | 600                  | 708                 | 0.207          |
| D             | 600                  | 1415                | 0.281          |
| E             | 570                  | 354                 | 0.243          |
| F             | 640                  | 354                 | 0.237          |
| G             | 660                  | 354                 | 0.258          |

## Section S2. Measurement of lattice parameter of $\epsilon$ -Ga<sub>2</sub>O<sub>3</sub>

In order to calculate the lattice parameters more accurately, Bragg angle correction was performed at first by the measurement of the diffraction patterns of (004) and (006) plane. According to the Bragg's law, the following equation can be deduced <sup>1</sup>:

$$\frac{4\lambda}{2\sin(\theta_{004-meas} + \Delta\theta)} = \frac{6\lambda}{2\sin(\theta_{006-meas} + \Delta\theta)} \quad (1)$$

where  $\lambda$  is the wavelength of X-ray ( $\lambda = 0.1542$  nm),  $\theta_{004-meas}$ ,  $\theta_{006-meas}$  are the measured Bragg angle, and  $\Delta\theta$  is the Bragg angle correction due to the zero setting of instrumental alignment. Thus,  $\Delta\theta$  is calculated as  $-0.148^\circ$  from Eq. (1). Then, the lattice spacing ( $d_{hkl}$ ) of the crystal plane ( $hkl$ ) can be calculated from Eq. (2).

$$d_{hkl} = \frac{n\lambda}{2\sin(\theta_{hkl-meas} + \Delta\theta)} \quad (2)$$

Using  $d_{004}$ ,  $d_{013}$  and  $d_{133}$ , we can deduce the lattice parameters (a, b and c) using the following equation (Eq. (3)).

$$\frac{1}{d_{hkl}^2} = \frac{h^2}{a^2} + \frac{k^2}{b^2} + \frac{l^2}{c^2} \quad (3)$$

Figure S2 shows the result of  $2\theta$ -scan:  $\epsilon$ -Ga<sub>2</sub>O<sub>3</sub> (004),  $\epsilon$ -Ga<sub>2</sub>O<sub>3</sub> (006),  $\epsilon$ -Ga<sub>2</sub>O<sub>3</sub> (013) and  $\epsilon$ -Ga<sub>2</sub>O<sub>3</sub> (133). The  $\chi$  angle of (013) and (133) are  $19.63^\circ$  and  $50.96^\circ$ , respectively. All peak positions were obtained by fitting a Gaussian function to the experimental curve. The measured Bragg angle ( $\theta_{hkl-meas}$ ) of  $\epsilon$ -Ga<sub>2</sub>O<sub>3</sub> (600 °C, VI/III = 354) and the corresponding lattice spacing ( $d_{hkl}$ ) are listed in Table S2. According to the Eq. (1), Eq. (2) and Eq. (3), we obtain:  $a = 0.503$  nm,  $b = 0.872$  nm,  $c = 0.928$  nm.

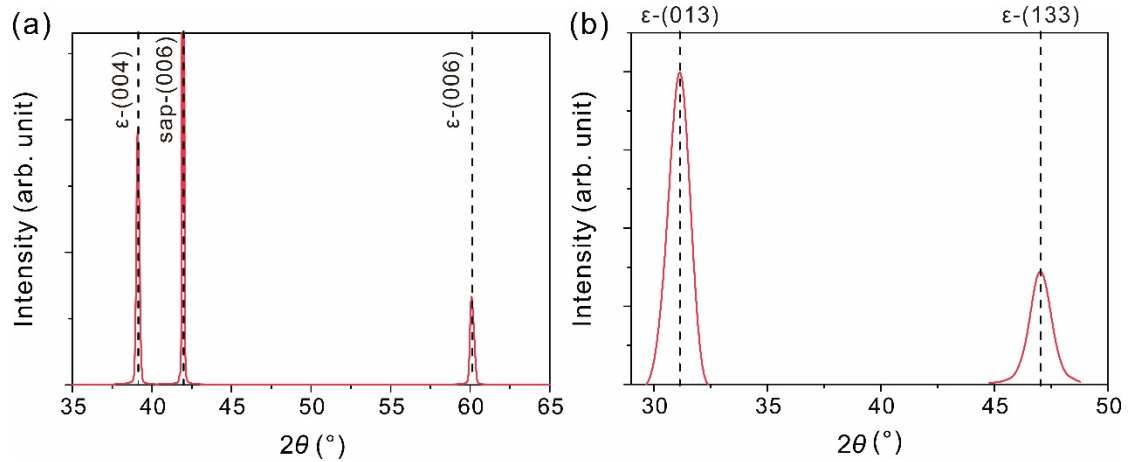

Figure S2. Diffraction peaks of  $\epsilon$ -Ga<sub>2</sub>O<sub>3</sub> films from XRD  $2\theta$ -scan mode.

Table S2. The measured Bragg angle and the calculated lattice spacing

| <i>crystal plane</i>    | <i>(004)</i> | <i>(006)</i> | <i>(013)</i> | <i>(133)</i> |
|-------------------------|--------------|--------------|--------------|--------------|
| $\theta_{hkl-meas}$ (°) | 19.550       | 30.035       | 15.573       | 23.515       |
| $d_{hkl}$ (nm)          | 0.232        | 0.155        | 0.292        | 0.195        |

### Section S3. SEM analysis of growth rate under different growth conditions

The thickness of the Ga<sub>2</sub>O<sub>3</sub> thin films with the growth temperatures and VI/III ratio was measured by SEM. The cross-sectional SEM images are shown in Figure S3.

The growth rate can be extracted as follow:

$$\text{growth rate}(\text{nm}/\text{min}) = [\text{epilayer}(\text{nm}) - \text{nucleation layer}(\text{nm})] / \text{growth time}(\text{min}).$$

Here, the nucleation layer thickness is about 30 nm.

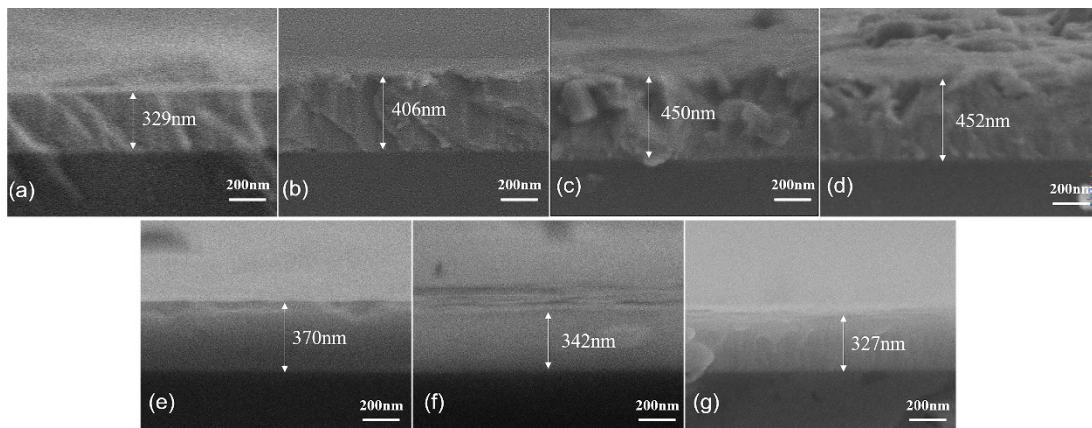

Figure S3. The cross-sectional SEM image of Ga<sub>2</sub>O<sub>3</sub> thin film grown at 600 °C with VI/III ratio of (a) 177, (b) 354, (c) 708, (d) 1415 and growth with VI/III ratio of 354 at (e) 570 °C, (f) 640 °C and (g) 660 °C, respectively.

1. X. Zheng, Y. Wang, Z. Feng, H. Yang, H. Chen, J. Zhou and J. Liang, *Journal of Crystal Growth*, 2003, **250**, 345-348.
